# Supplementary material for: Technical developments for high resolution magnetic resonance microscopy in a horizontal bore magnet
Source: Research Square preprint supplement (doi:10.21203/rs.3.rs-6550180/v1), 2025-05-10
Supplement: Supplementary file 1 [file 1c342b52c38b10d93ed9eefa.docx]

**Supplementary Figure 1**


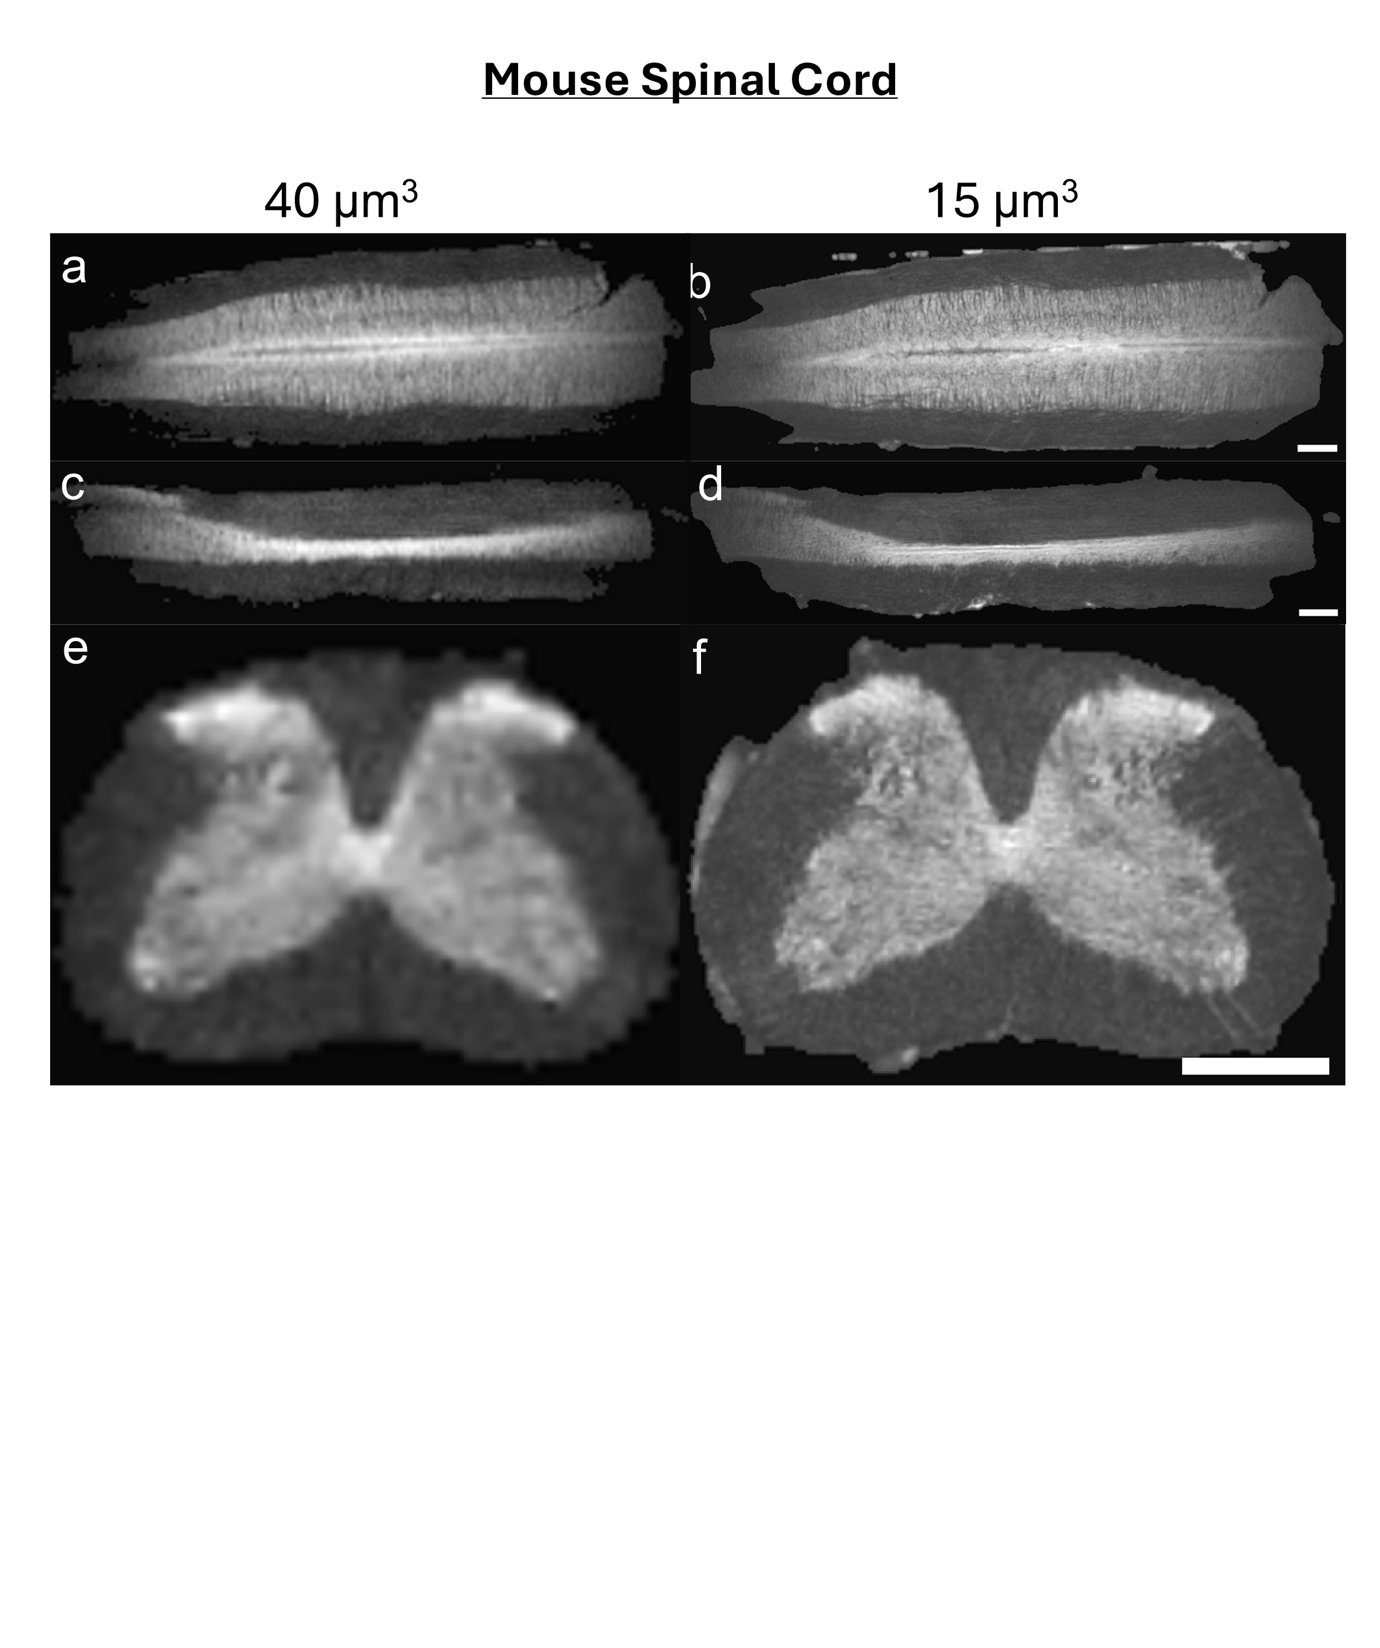


**Supplementary Figure 1 |** Comparison of mouse spinal cord at 40 μm³ and 15 μm³ resolutions. **(a,b)** Comparison of coronal slices. **(c,d)** Comparison of sagittal slices. **(e,f)** Comparison of transverse slices. The spinal cord microstructures, as discussed in Section 1.2.1 of Results, are more clearly resolved at a resolution of 15 μm³ compared to 40 μm³. The scale bars represent 500 μm.

**Supplementary Figure 2**


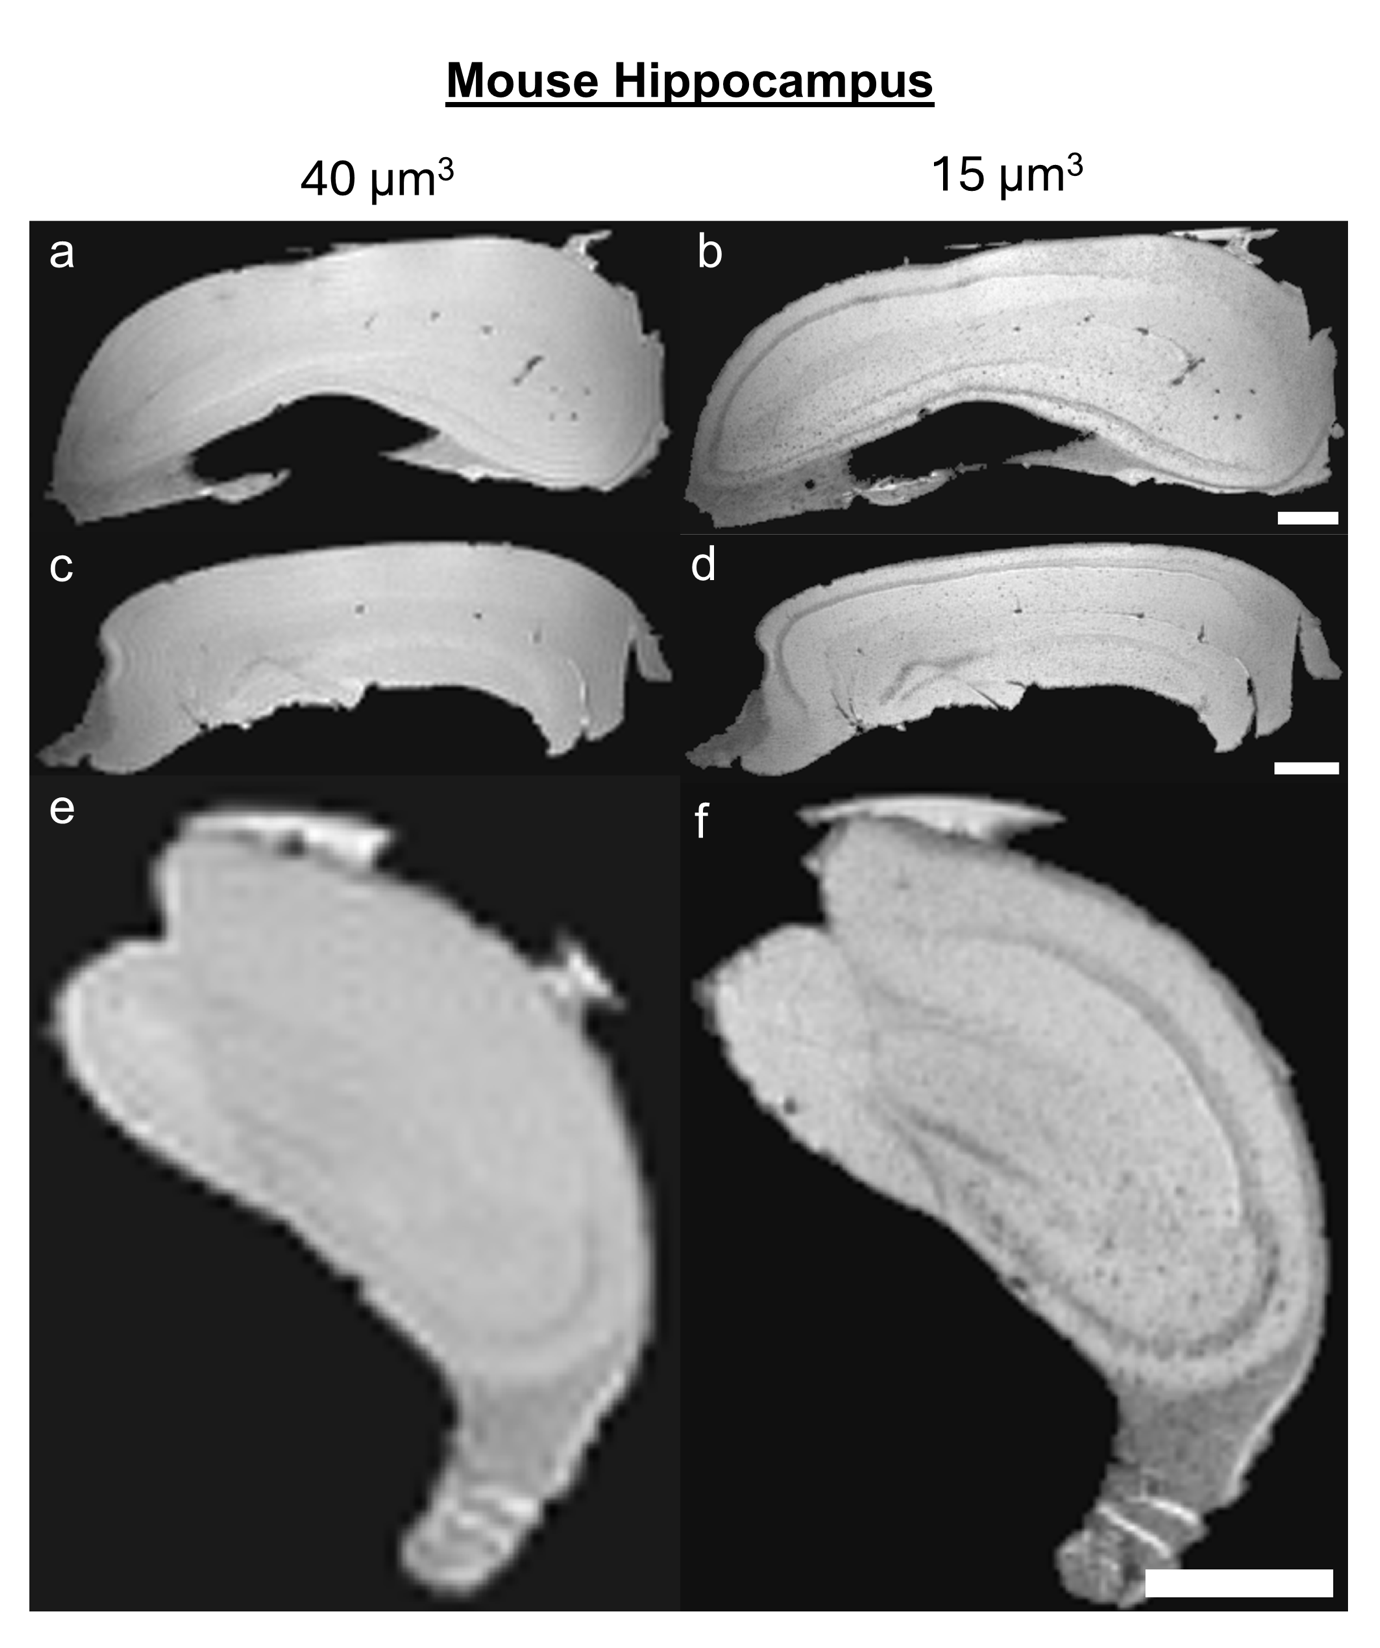


**Supplementary Figure 2 |** Comparison of mouse hippocampus at 40 μm³ and 15 μm³ resolutions. **(a,b)** Comparison of coronal slices, respectively. **(c,d)** Comparison of sagittal slices. **(e,f)** Comparison of transverse slices. The hippocampal microstructures, as discussed in Section 1.2.2 of Results, are more clearly resolved at a resolution of 15 μm³ compared to 40 μm³. The scale bars represent 500 μm.

**Supplementary Figure 3**


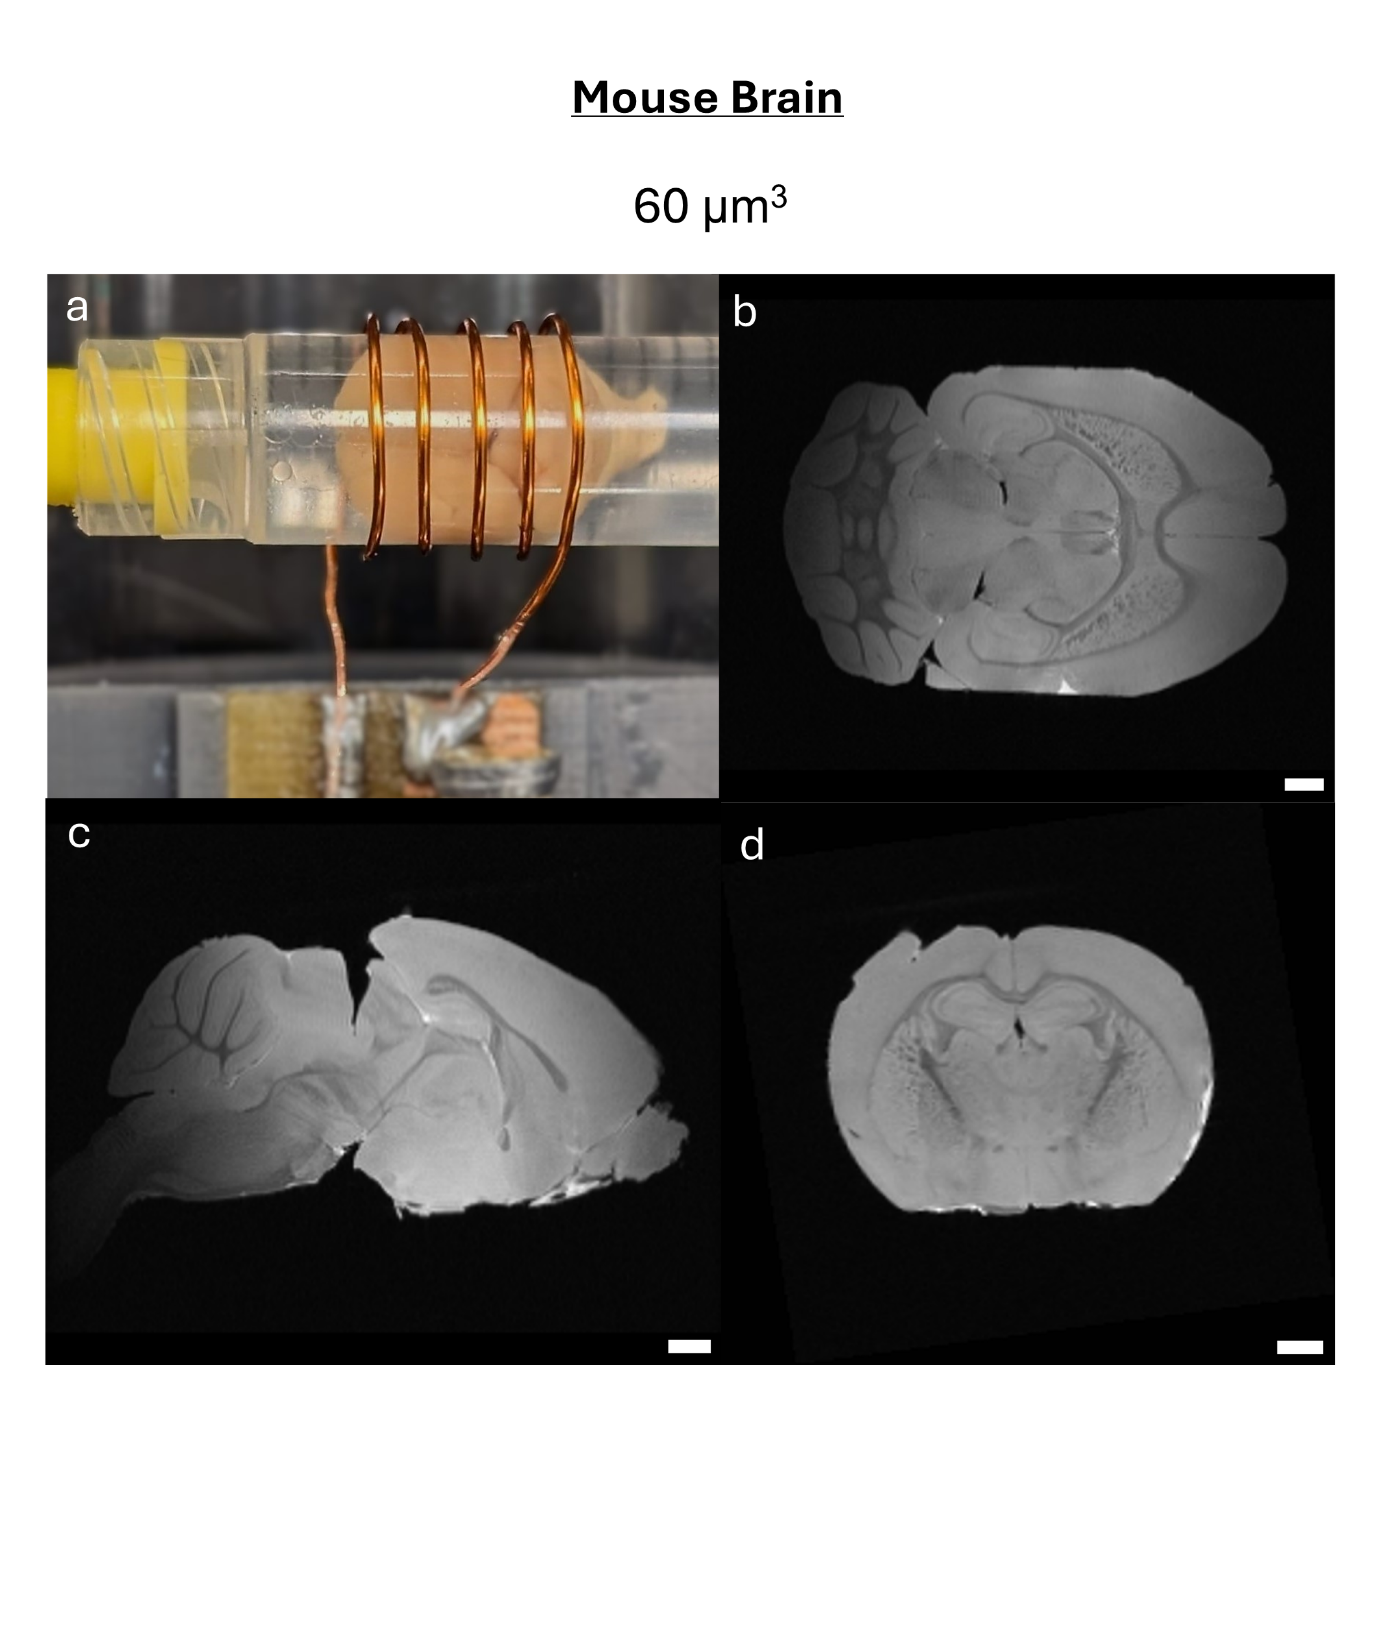


**Supplementary Figure 3** | MR microscopy of an excised mouse brain using the micro-imaging probe using 10 mm diameter solenoid. **(a)** A5-turn10 mm diameter solenoid soldered to the probe. **(b)** Coronal slice of the brain. **(c)** Sagittal slice of the brain. **(d)** Axial slice of the brain. A 3D FLASH sequence was used to acquire images at a spatial resolution of 60 μm³ with an SNR of 68. Imaging parameters were as follows: flip angle = 47.9°, repetition time (TR) = 100 ms, echo time (TE) = 3.56 ms, number of repetitions = 6, image matrix = 268×200×200, field of view (FOV) = 16×12×12 mm³, resolution = 60×60×60 μm³, receiver bandwidth = 65,789 Hz, and scan time = 6 hours and 40 minutes. The scale bars represent 1000 μm.

**Supplementary Figure 4**

*
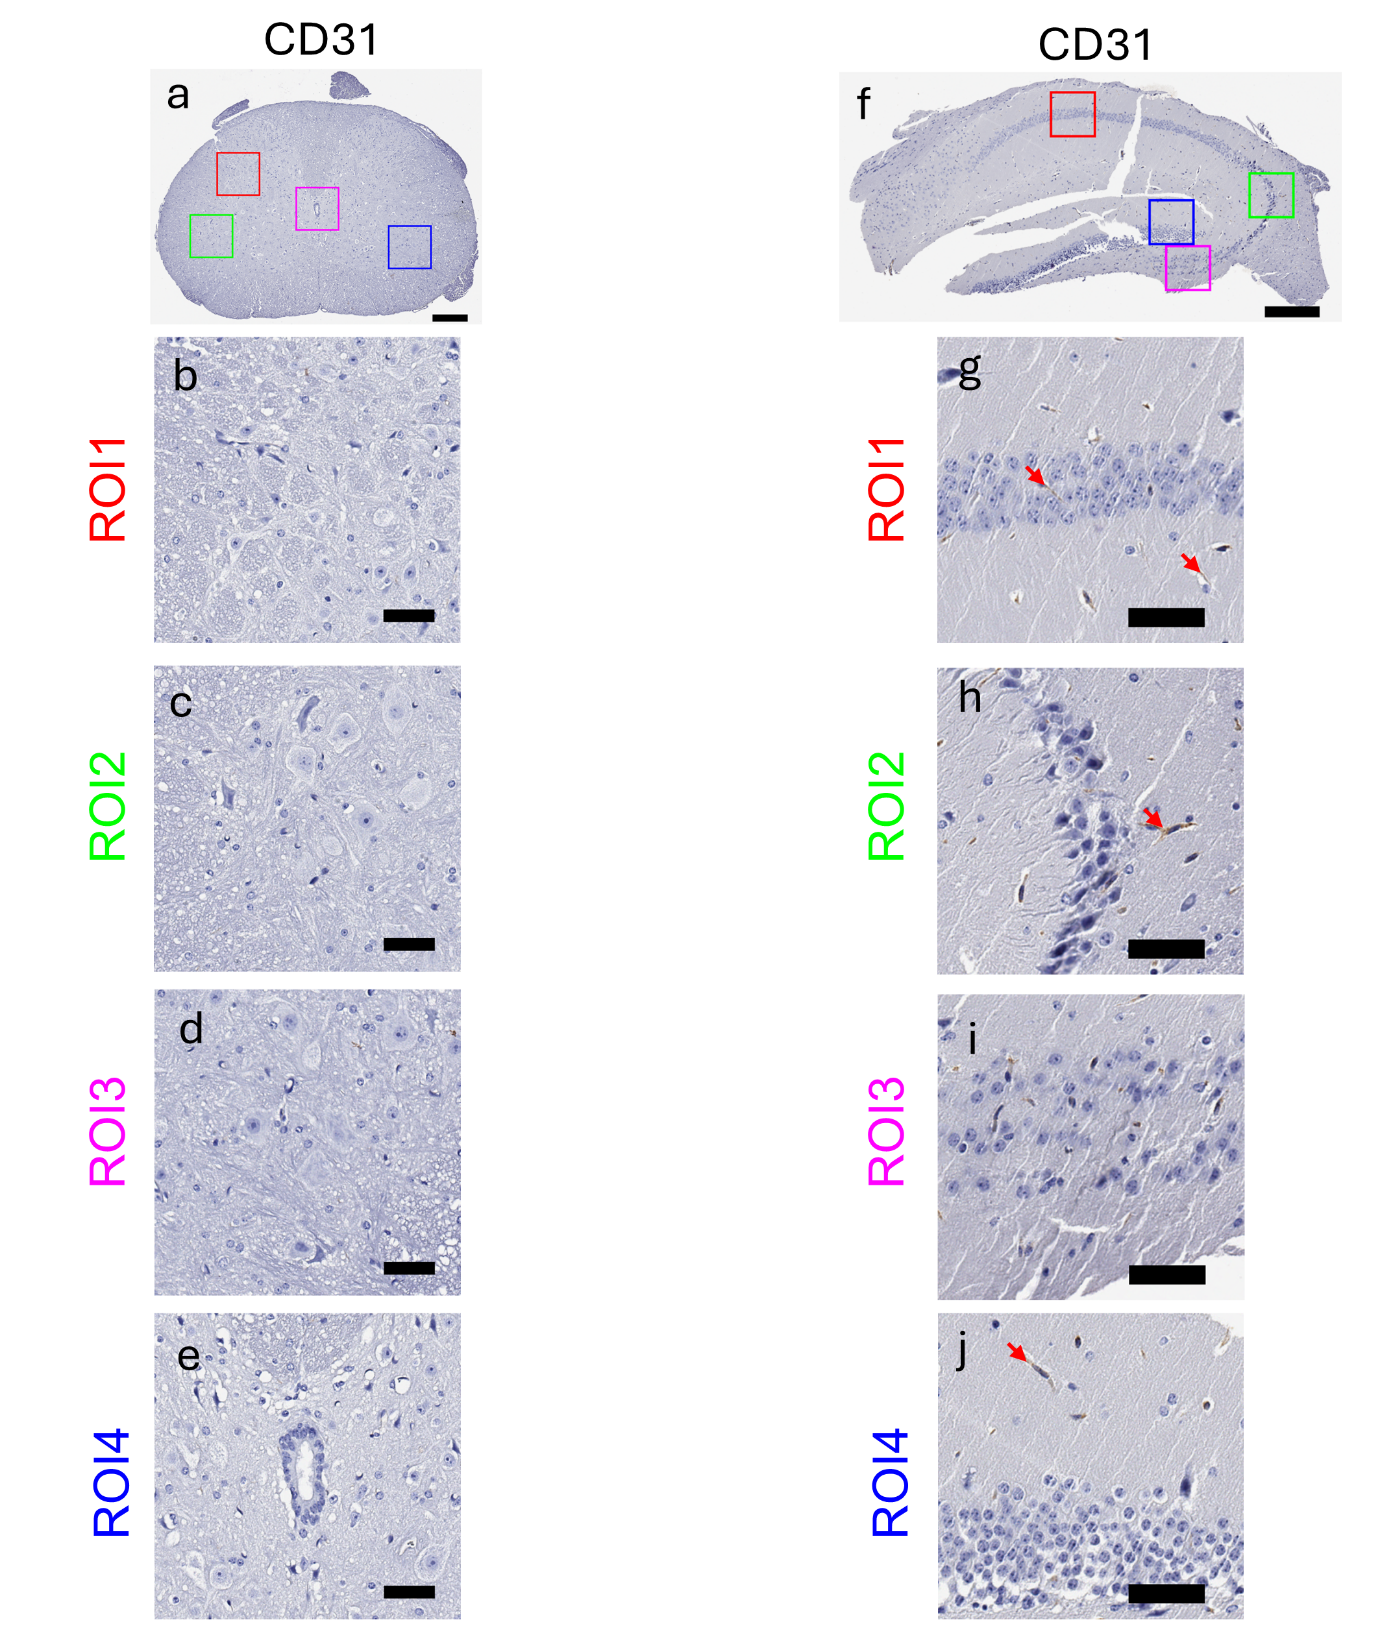
*

**Supplementary Figure 4 |** CD31 stain of the spinal cord and hippocampus tissue. **(a)** CD31 stain of a transverse section of the spinal cord with four regions of interest (ROIs) highlighted in different colors. **(b)** ROI 1 (red) covers the intermediate zone and dorsal horn of the spinal cord. **(c)** ROI 2 (green) corresponds to the left ventral horn region. **(d)** ROI 3 (blue) corresponds to the right ventral horn region. **(e)** ROI 4 (magenta) represents the central canal region of the spinal cord. **(f)** CD31 stain of a transverse section of the hippocampus with four regions of interest (ROIs) highlighted in different colors. **(b)** ROI 1 (red) covers the CA1 cellular layer. **(c)** ROI 2 (green) corresponds to the CA2 cellular layer. **(d)** ROI 3 (blue) corresponds to the CA3 cellular layer. **(e)** ROI 4 (magenta) represents the granule cellular layer of the dentate gyrus. The red arrows in **Fig.** **(f-j)** represent the possible blood vessel. The scale bar in **(a)** and **(f)** represents 250 µm and the scale bar for stained ROI Fig. **(b-e)** and **(g-j)** represents 50 µm.

**Supplementary table1**

**List of items used to build the Micro-imaging probe.**

**Supplementary video 1**

The video file is attached separately.

**Supplementary video 2**

The video file is attached separately.
